# Supplementary material
Source: HighWire-hosted journal article supplement (https://erj.ersjournals.com/content/57/2/2003002)
Supplement: inline-supplementary-material-1 [file inline-supplementary-material-1.pdf]

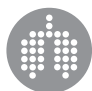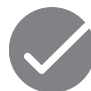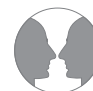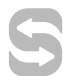

SHAREABLE PDF

# Residual symptoms and lower lung function in patients recovering from SARS-CoV-2 infection

Frederik Trinkmann <sup>1,2</sup>, Michael Müller<sup>1</sup>, Alexandra Reif<sup>1</sup>, Nicolas Kahn <sup>1</sup>, Michael Kreuter<sup>1</sup>, Franziska Trudzinski<sup>1</sup>, Monika Eichinger<sup>3</sup>, Claus-Peter Heussel <sup>3,4</sup> and Felix J.F. Herth <sup>1</sup> for the Lung Network Rhine-Neckar-Region for the Lung Network Rhine-Neckar-Region<sup>5</sup>

**Affiliations:** <sup>1</sup>Pneumology and Critical Care Medicine, Thoraxklinik at University Hospital Heidelberg, Translational Lung Research Center Heidelberg (TLRC), Member of German Center for Lung Research (DZL), Heidelberg, Germany. <sup>2</sup>Dept of Biomedical Informatics at the Heinrich-Lanz-Center, University Medical Center Mannheim, Heidelberg University, Mannheim, Germany. <sup>3</sup>Dept of Diagnostic and Interventional Radiology with Nuclear Medicine, Thoraxklinik at University Hospital Heidelberg, Translational Lung Research Center Heidelberg (TLRC), Member of German Center for Lung Research (DZL), Heidelberg, Germany. <sup>4</sup>Dept of Diagnostic and Interventional Radiology, University Hospital Heidelberg, Heidelberg, Germany. <sup>5</sup>A list of members of the Lung Network Rhine-Neckar-Region can be found in the acknowledgements section.

**Correspondence:** Felix J.F. Herth, Thoraxklinik at University Hospital Heidelberg, Röntgenstraße 1, 69126 Heidelberg, Germany. E-mail: felix.herth@med.uni-heidelberg.de

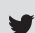

@ERSpublications

**About half of the patients recovering from SARS-CoV-2 have persistent symptoms and lower lung function as long as 2 months after infection. This is common even in younger SARS-CoV-2 convalescents with few comorbidities.** <https://bit.ly/38dyCYB>

**Cite this article as:** Trinkmann F, Müller M, Reif A, *et al.* Residual symptoms and lower lung function in patients recovering from SARS-CoV-2 infection. *Eur Respir J* 2021; 57: 2003002 [<https://doi.org/10.1183/13993003.03002-2020>].

This single-page version can be shared freely online.

## To the Editor:

Initial reports of severe acute respiratory syndrome coronavirus 2 (SARS-CoV-2) infection indicate only mild disease in 81% of symptomatic cases [1]. Nearly half of the infected individuals do not seem to develop clinical symptoms at all, depending on the cohort investigated [2]. Comorbidities and older age were identified early during the pandemic as predictors for severe or critical disease [3], which is found in about 19% [1]. Independently from disease severity, little is known about longer-term outcomes as well as resolution of symptoms. We therefore set out to systematically evaluate residual symptoms and lung function impairment in patients after SARS-CoV-2 infection.
